# Supplementary material for: Do the Antenatal Care and Perinatal Outcomes of Women with a Vietnamese Migration Background Differ from Those of Other Women? A Retrospective Analysis
Source: PubMed Central journal article supplement — Geburtshilfe Frauenheilkd. 2025 Jan 2;85(1):56–68. doi: 10.1055/a-2446-6504 (PMC11695097; doi:10.1055/a-2446-6504), 2025-01-02
Supplement: 10-1055-a-2446-6504_24632592.pdf [file 10-1055-a-2446-6504_24632592.pdf]

## Zusatzmaterial

**Tab. S1:** Geburtsmodus und Geburtsverletzungen von Patientinnen mit vietnamesischer Herkunft im Vergleich mit und ohne Meldeadresse in einer Unterkunft für Geflüchtete; verwendet wurde der Mann-Whitney-U-Test für nominale Variablen und der zweiseitige exakte Fisher-Test für kategorielle Variablen (Signifikanzniveau  $p=0,05$ ).

|                                             | Vietnamesischer Migrationshintergrund und Adresse in Unterkunft für Geflüchtete | Vietnamesischer Migrationshintergrund und Privatadresse | p      |
|---------------------------------------------|---------------------------------------------------------------------------------|---------------------------------------------------------|--------|
| Sectio insgesamt                            | 37 (17,77%)                                                                     | 66 (25,29%)                                             | 0,056  |
| Primäre Sectio                              | 12 (32,43%)                                                                     | 25(37,87%)                                              | 0,671  |
| Sekundäre Sectio                            | 25 (67,58%)                                                                     | 41(62,12%)                                              | 0,671  |
| Notsektio                                   | 5 (13,5%)                                                                       | 1(1,51%)                                                | 0,022* |
| Geplante Sectio                             | 16 (43,24%)                                                                     | 44 (66,67%)                                             | 0,024* |
| Re-Sectio                                   | 13 (81,3%)                                                                      | 27 (61,36%)                                             | 0,218  |
| Beckenendlage/Querlage                      | 1 (6,25%)                                                                       | 10 (22,73%)                                             | 0,259  |
| Maternale Vorerkrankung                     | -                                                                               | 2 (4,54%)                                               | 1,0    |
| Makrosomie                                  | 1 (6,25%)                                                                       | 1 (2,27%)                                               | 0,354  |
| FGR/Plazentainsuffizienz                    | -                                                                               | -                                                       | 1,0    |
| Plazenta praevia                            | 1 (6,25%)                                                                       | 2 (4,54%)                                               | 0,483  |
| Z.n. Myomenukleation                        | -                                                                               |                                                         |        |
| Uterus myomatosus                           | -                                                                               |                                                         |        |
| Kindliche Indikation                        | -                                                                               |                                                         |        |
| Präventivsektio                             | -                                                                               | 2(4,54%)                                                | 1,0    |
| Grund für Präventivsektio                   |                                                                                 |                                                         |        |
| Angst/Angststörung                          | -                                                                               | 1(50%)                                                  | 1,0    |
| Z.n. traumatisch empfundener Geburt         | -                                                                               | -                                                       |        |
| Z.n. höhergradigem Dammriss                 | -                                                                               | 1(50%)                                                  | 1,0    |
| Z.n. traumatischer Geburt im Bekanntenkreis | -                                                                               | -                                                       |        |
| Z.n. Schulterdystokie                       | -                                                                               | -                                                       |        |
| Wunsch ohne Angaben                         | -                                                                               | -                                                       |        |
| Z.n. Kinderwunschtherapie+ maternales Alter | -                                                                               | -                                                       |        |
| Symphysenlockerung                          | -                                                                               | -                                                       |        |
| Ungeplante Sectio                           | 21 (56,76%)                                                                     | 22 (33,33%)                                             | 0,024* |
| Pathologisches CTG                          | 5 (23,80%)                                                                      | 8 (36,36%)                                              | 0,509  |
| Geburtsstillstand                           | 10 (47,62%)                                                                     | 9 (40,91%)                                              | 0,763  |
| Geburtsstillstand Eröffnungsperiode         | 6 (28,57%)                                                                      | 5(22,73%)                                               | 0,736  |
| Geburtsstillstand Austrittsphase            | 4(19,05%)                                                                       | 4(18,18%)                                               | 1,0    |
| Beckenend- oder Querlage                    | -                                                                               | -                                                       | 1,0    |
| V.a. Uterusdehiszenz                        | 2 (9,52%)                                                                       | 1(4,54%)                                                | 0,607  |
| Triple I/Amnioninfektionssyndrom            | 2 (9,52%)                                                                       | 2 (9,09%)                                               | 1,0    |
| Vorzeitige Plazentalösung                   | -                                                                               | 1(4,54%)                                                | 1,0    |
| Präeklampsie                                | 2 (9,52%)                                                                       | -                                                       | 0,233  |
| FGR/Plazentainsuffizienz                    | -                                                                               | -                                                       | 1,0    |
| Frustraner Einleitungsversuch               | -                                                                               | 1(4,54%)                                                | 1,0    |
| Spontan                                     | 151(72,24%)                                                                     | 175(67,0%)                                              | 0,229  |
| Vakuum                                      | 21(10,04%)                                                                      | 20 (7,66%)                                              | 0,412  |
| Davon Periduralanästhesie                   | 43 (25,15%)                                                                     | 39 (20%)                                                | 0,114  |
| Davon Verletzungen                          | 128 (74,44%)                                                                    | 134(68,72%)                                             | 0,248  |
| Dammriss I                                  | 25(14,53%)                                                                      | 23 (11,79%)                                             | 0,286  |
| Dammriss II                                 | 41(23,83%)                                                                      | 44 (22,56%)                                             | 0,805  |
| Dammriss III                                | 7(4,07%)                                                                        | 6(3,07%)                                                | 0,470  |
| Dammriss IV                                 | -                                                                               | -                                                       | 1,0    |
| Episiotomie gesamt                          | 46(26,74%)                                                                      | 53(27,18%)                                              | 0,651  |

|                                                      |                     |                    |         |
|------------------------------------------------------|---------------------|--------------------|---------|
| Episiotomie bei Vakuumextraktion                     | 11(52,38%)          | 10 (50%)           | 1,0     |
| Episiotomie Spontanpartus                            | 35 (23,18%)         | 43 (24,57%)        | 0,796   |
| Zervixriss                                           | 1 (0,58%)           | 3 (1,53%)          | 0,632   |
| Labiennriss                                          | 8(4,65%)            | 10(5,13%)          | 1,0     |
| Scheidenriss                                         | 22(12,7%)           | 15 (7,69%)         | 0,059   |
| Gestationsalter bei Geburt in Wochen (Tagen)         | 39+3±1+2            | 39+0±1+5           | 0.015*  |
| Kindliches Geburtsgewicht in g                       | 3214,81<br>±400,12g | 3235,34<br>±470,89 | 0,342   |
| Kindliche Körperlänge in cm                          | 50,24±2,16          | 50,13±2,60         | 0,969   |
| Kindlicher Kopfumfang in cm                          | 34,13±1,71          | 34,36±1,79         | 0,027*  |
| Kinder <10.Perzentil                                 | 42 (20,09%)         | 29 (11,1%)         | 0,0092* |
| Kinder 10-90.Perzentil                               | 162 (77,51%)        | 225 (86,21%)       | 0,0152* |
| Kinder >90. Perzentil                                | 5 (2,39%)           | 7(2,7%)            | 1,0     |
| Nabelarterien-pH                                     | 7,235±0,066         | 7,245±0,06         | 0,077   |
| Nabelarterien-pH <7                                  | -                   | -                  | 1,0     |
| Nabelarterien-PH 7,0 – 7,09                          | 4 (1,91%)           | 3 (1,14%)          | 0,705   |
| Nabelarterien pH 7,1-7,19                            | 53 (25,36%)         | 60 (22,99%)        | 0,588   |
| Nabelarterien-pH ≥ 7,20                              | 152 (72,72%)        | 198 (75,86%)       | 0,457   |
| 5-Minuten-Apgar                                      | 9,53±0,77           | 9,40±1,02          | 0,495   |
| 5-Min-Apgar ≤7                                       | 6 (2,87%)           | 13 (4,98%)         | 0,347   |
| Aufnahme auf die Neonatologie                        | 14 (6,69%)          | 42 (16,09%)        | 0,0016* |
| mit Gestationsalter ≥ 37+0 SSW                       | 11 (5,47%)          | 28(11,5%)          | 0,028*  |
| Peripartaler Blutverlust in ml                       | 417,46±505,92       | 448,13±327,93      | 0,162   |
| Blutverlust                                          |                     |                    |         |
| <500ml                                               | 148 (70,82%)        | 159(60,91%)        | 0,032*  |
| ≥ 500 bis <1000ml                                    | 55 (26,31%)         | 81(31,03%)         | 0,306   |
| ≥1000 bis <1500ml                                    | 4 (1,91%)           | 8(3,06%)           | 0,561   |
| ≥1500ml                                              | 2 (0,95%)           | 9(3,44%)           | 0,122   |
| Entlassungs-Hämoglobinkonzentration (mg/dl)          | 10,81±1,58          | 10,94±1,55         | 0,375   |
| Erythrozytenkonzentrate erhalten                     | 3 (1,43%)           | 5(1,92%)           | 0,738   |
| Ideales Outcome:                                     | 101(48,32%)         | 108(41,14%)        | 0,136   |
| -Geburt ≥37+0 SSW                                    | 201 (96,17%)        | 242(92,72%)        | 0,162   |
| -Apgar ≥8                                            | 203 (97,13%)        | 247(94,63%)        | 0,251   |
| -pH ≥7,20                                            | 152(72,72%)         | 198(75,86%)        | 0,456   |
| -Blutverlust <500ml                                  | 180 (86,12%)        | 214(81,99%)        | 0,257   |
| -keine Verlegung auf die Neonatologie                | 195(93,3%)          | 219(83,90%)        | 0,0016* |
| +Spontan/Vakuum (keine Sectio und kein Dammriss III) | 165(78,94%)         | 189(72,41%)        | 0,108   |

**Tab. S2:** Regressionsanalyse: **a)** Einflussfaktoren auf Sectio, **b)** Verlegung auf die Neonatologie, **c)** Dammriss III°.**Tab. S2.a) Einflussfaktoren auf die Durchführung einer Sectio.**

|                                             | OR    | 95% Konfidenzintervall |             | p-Wert |
|---------------------------------------------|-------|------------------------|-------------|--------|
|                                             |       | Unterer Wert           | Oberer Wert |        |
| BMI >=30kg/m <sup>2</sup>                   | 1,356 | 0,930                  | 1,978       | 0,114  |
| Kindliches Gewicht <10.Perzentile           | 1,352 | 0,896                  | 2,039       | 0,151  |
| Erste Voruntersuchung ≤ 20 weeks            | 1,168 | 0,784                  | 1,741       | 0,445  |
| Kindliches Gewicht <90.Perzentile           | 1,060 | 0,609                  | 1,846       | 0,837  |
| Neonatales Geburtsgewicht                   | 1,000 | 1,000                  | 1,001       | 0,038  |
| Maternale Größe                             | 0,973 | 0,956                  | 0,990       | 0,002  |
| Gestationsalter in Tagen bei Geburt         | 0,945 | 0,932                  | 0,958       | <0,001 |
| Vietnamesischer Migrationshintergrund       | 0,679 | 0,425                  | 1,084       | 0,105  |
| Unterbringung in Unterkunft für Geflüchtete | 0,510 | 0,358                  | 0,727       | <0,001 |

**Tab. S2.b) Einflussfaktoren auf eine kindliche Verlegung auf die Neonatologie.**

|                                             | OR    | 95% Konfidenzintervall |             | p-Wert |
|---------------------------------------------|-------|------------------------|-------------|--------|
|                                             |       | Unterer Wert           | Oberer Wert |        |
| Kindliches Gewicht >90. Perzentile          | 1,143 | 0,513                  | 2,547       | 0,743  |
| Kindliches Gewicht <10.Perzentile           | 1,161 | 0,665                  | 2,029       | 0,599  |
| Sectio                                      | 1,119 | 0,804                  | 1,557       | 0,507  |
| Neonatales Geburtsgewicht                   | 1,00  | 0,999                  | 1,000       | 0,434  |
| Vietnamesischer Migrationshintergrund       | 1,079 | 0,708                  | 1,644       | 0,724  |
| Gestationsalter bei Geburt                  | 0,932 | 0,915                  | 0,950       | <0,001 |
| Unterbringung in Unterkunft für Geflüchtete | 0,451 | 0,230                  | 0,886       | 0,021  |
| 5-Minuten-Apgar                             | 0,446 | 0,382                  | 0,520       | <0,001 |
| Nabelarterien-pH                            | 0,231 | 0,030                  | 1,790       | 0,161  |

**Tab. S2.c) Einflussfaktoren auf einen Dammriss III° oder IV°.**

|                                             | OR    | 95% Konfidenzintervall |             | p-Wert |
|---------------------------------------------|-------|------------------------|-------------|--------|
|                                             |       | Unterer Wert           | Oberer Wert |        |
| Vietnamesischer Migrationshintergrund       | 5,385 | 1,361                  | 21,307      | 0,016* |
| Episiotomie                                 | 1,612 | 0,594                  | 4,375       | 0,349  |
| Adresse in einer Unterkunft für Geflüchtete | 1,16  | 0,367                  | 3,661       | 0,801  |
| Kindlicher Kopfumfang (cm)                  | 1,112 | 0,909                  | 1,361       | 0,301  |
| Vakuumextraktion                            | 1,107 | 0,301                  | 4,075       | 0,879  |
| Maternale Größe (cm)                        | 1,025 | 0,942                  | 1,115       | 0,564  |
| Kindliches Geburtsgewicht (g)               | 1,0   | 0,999                  | 1,001       | 0,804  |
| Gestationsdiabetes                          | 1,089 | 0,623                  | 1,902       | 0,764  |
